# Supplementary material for: Effect of lifelong sucrose consumption at human-relevant levels on food intake and body composition of C57BL/6N mice
Source: PubMed Central journal article supplement (PMC9798237; doi:10.3389/fnut.2022.1076073), 2022-12-15
Supplement: Image_1.pdf [file Image_1.pdf]

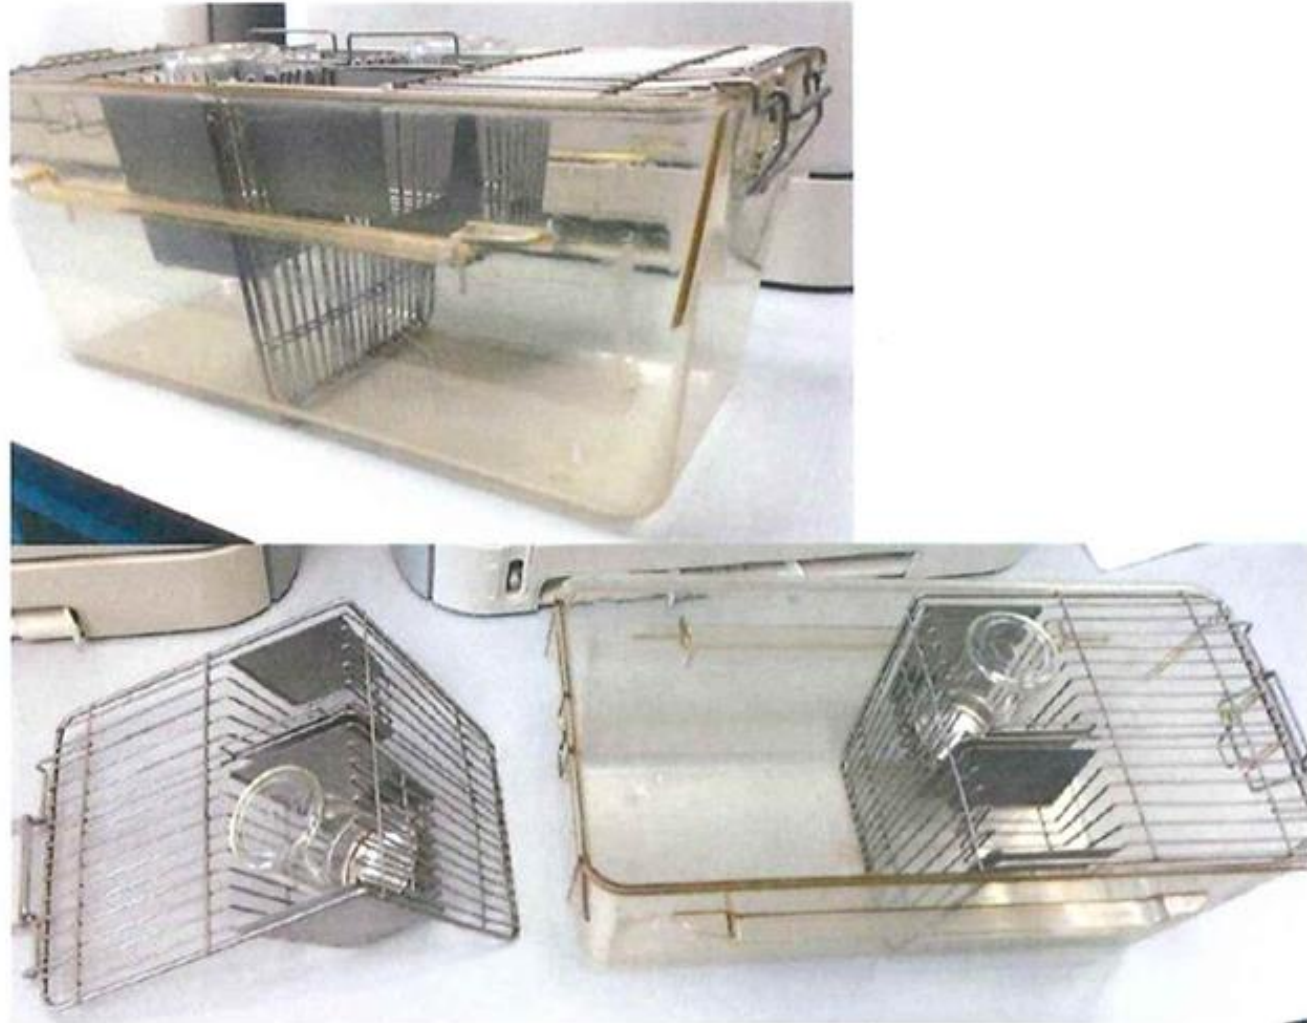

**Online Supplemental Fig. 1** – Special cage cover that separates the cage in half for individual food and water intake assessment
